# Supplementary material for: Insights into the coordination mode of quercetin with the Al(iii) ion from a combined experimental and theoretical study
Source: Royal Society of Chemistry journal article supplement (doi:10.1039/c4dt00212a), 2014-01-01
Supplement: c4dt00212a1.pdf [file c4dt00212a1.pdf]

## Supplementary Information

**Table S1** Summary of the relevant data taken in 4 titrations for the system  $\text{Al}^{3+}$ –quercetin

| $C_M$ , mol/dm <sup>3</sup> | $C_L$ , mol/dm <sup>3</sup> | pH <sub>range</sub> |
|-----------------------------|-----------------------------|---------------------|
| $0.5 \cdot 10^{-3}$         | $5 \cdot 10^{-3}$           | 2.0–3.6             |
| $5 \cdot 10^{-3}$           | $5 \cdot 10^{-3}$           | 1.6–2.8             |
| $0.5 \cdot 10^{-3}$         | $1 \cdot 10^{-3}$           | 2.1–3.4             |
| $1 \cdot 10^{-3}$           | $2 \cdot 10^{-3}$           | 1.8–3.2             |

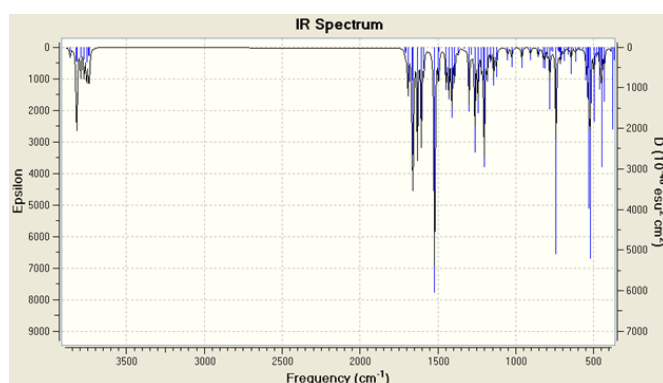

(a)

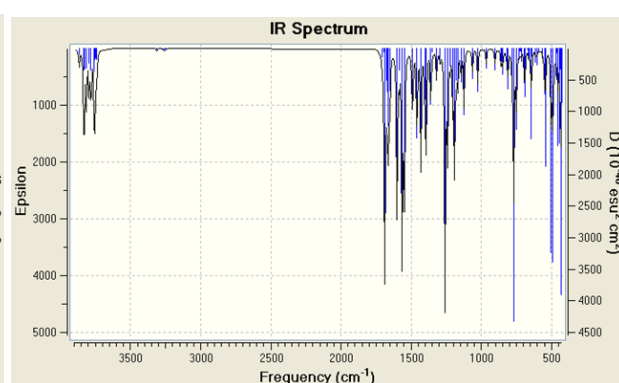

(b)

**Figure S1** The computed vibrational spectra of metallated complexes: **b3-4eq** (a) and **b4-5eq** (b)

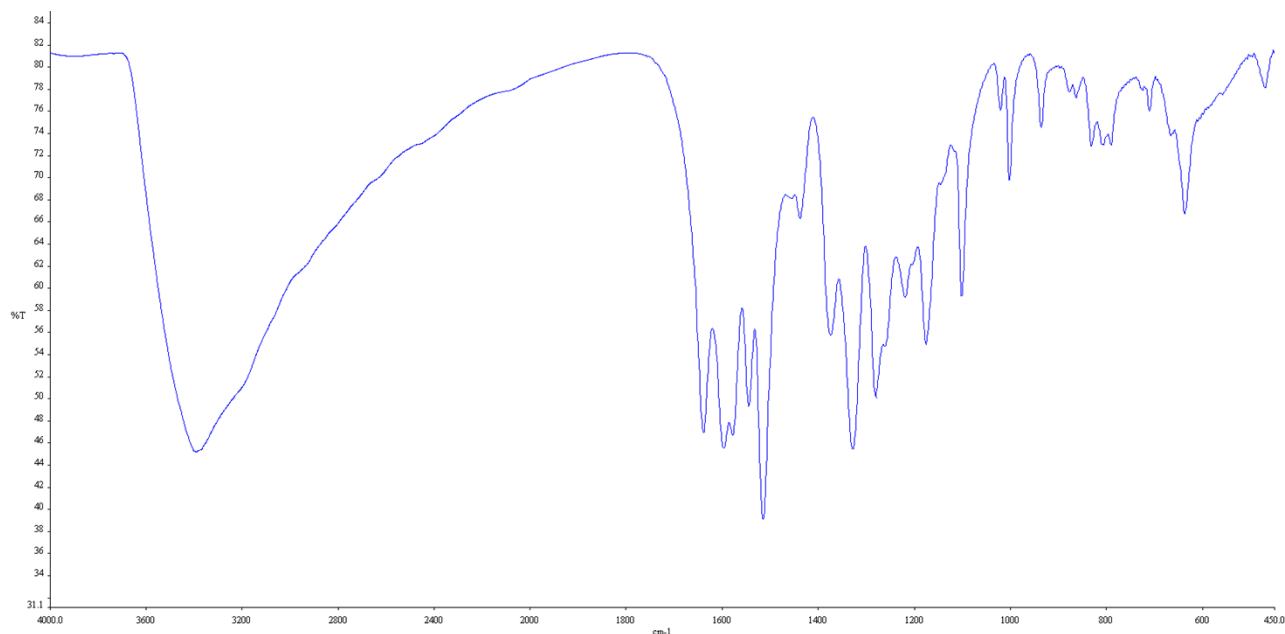

**Figure S2** The experimental vibrational spectrum of metallated complex

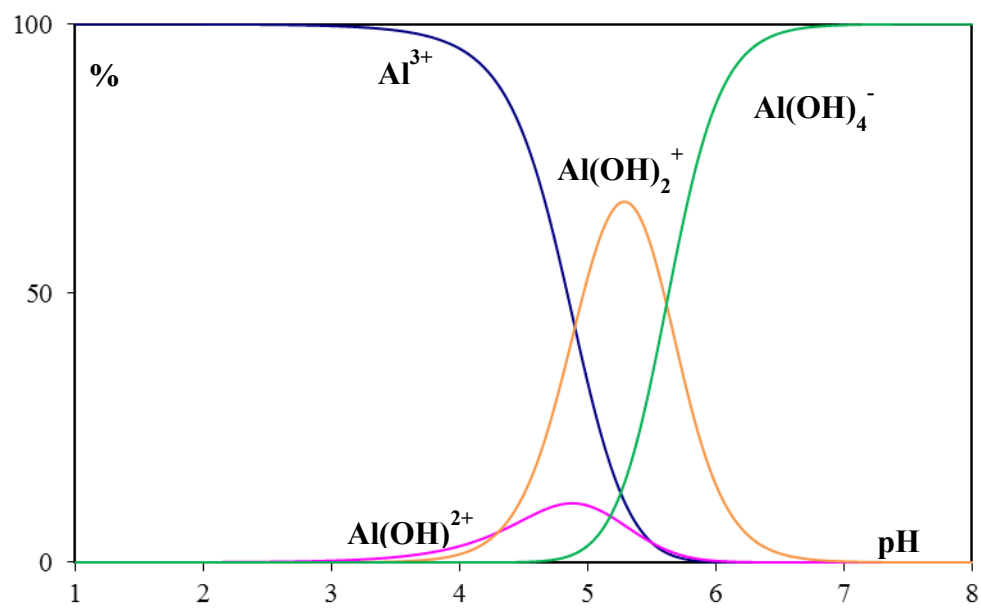

**Figure S3** Distribution of Al(III) ion in the hydrolytical species for  $C_M = 5 \cdot 10^{-3} \text{ mol/dm}^3$
